# Supplementary material
Source: PubMed Central journal article supplement (PMC4373740)

## SUPPLEMENTARY FIGURES

**Figure S1.** Generation of SMSr~~Ex6~~ mice. (A) Schematic drawing for the generation of SMSr~~Ex6~~ mice by homologous recombination (B) Genotyping PCR for wild type (+/+), heterozygous (+/SMSr~~Ex6~~) and homozygous (SMSr~~Ex6~~) mice; characteristic DNA fragments 386 bp (wild type), 707 bp (delEx6), 451 bp (floxed) (C) Southern blot analysis of SMSr~~Ex6~~ mice. Expected fragment sizes: *Xmn*I restriction: wild type 11.5 kbp, delEx6 2.9 kbp.

**Figure S2.** LC-MS analysis of main CPE species in testis (A), kidney (B), spleen (C), lung (D), heart (E), muscle (F) and small intestine (G) of wild type, SMSrD348E, SMS2gtXSMSrD348E and SMS2gt mice. Data are means  $\pm$  SEM; \*,  $p < 0.05$ , \*\*,  $p < 0.005$ ;  $n = 3-4$ .

**Figure S3.** LC-MS analysis of main SM species in testis (A), kidney (B), spleen (C), lung (D), heart (E), muscle (F) and small intestine (G) of wild type, SMSrD348E, SMS2gtXSMSrD348E and SMS2gt mice. Data are means  $\pm$  SEM; \*,  $p < 0.05$ , \*\*,  $p < 0.005$ , \*\*\*,  $p < 0.001$ ;  $n = 3-4$ .

**Figure S4.** MS analysis of main ceramide species in testis (A), kidney (B), spleen (C), lung (D), heart (E), muscle (F) and small intestine (G) of wild type, SMSrD348E, SMS2gtXSMSrD348E and SMS2gt mice. Data are means of two independent measurements  $\pm$  SEM; \*,  $p < 0.05$ , \*\*,  $p < 0.005$ , \*\*\*,  $p < 0.001$ ;  $n = 3-4$ .

**Figure S5.** MS analysis of main hexosylceramide species in testis (A), kidney (B), spleen (C), lung (D), heart (E), muscle (F) and small intestine (G) of wild type, SMSrD348E, SMS2gtXSMSrD348E and SMS2gt mice. Data are means of two independent measurements  $\pm$  SEM; \*,  $p < 0.05$ , \*\*,  $p < 0.005$ ;  $n = 3-4$ .

**Figure S6.** LC-MS analysis of CPE and SM content in forebrain, cerebellum, liver, testis, kidney, spleen, lung, heart, muscle and small intestine of wild type, SMSrD348E, SMS2gtXSMSrD348E and SMS2gt mice. (A-J) Analysis of total CPE in different tissues. (K-T) Analysis of total SM in different tissues.

Data are means  $\pm$  SEM; \*,  $p < 0.05$ , \*\*,  $p < 0.005$ , \*\*\*,  $p < 0.001$ ;  $n = 3-4$ .

**Figure S7.** MS analysis of ceramide and hexosylceramide content in forebrain, cerebellum, liver, testis, kidney, spleen, lung, heart, muscle and small intestine of wild type, SMSrD348E, SMS2gtXSMSrD348E and SMS2gt mice. (A-J) Analysis of total ceramide in different tissues. (K-T) Analysis of total hexosylceramide in different tissues. Data are means of two independent measurements  $\pm$  SEM; \*,  $p < 0.05$ , \*\*,  $p < 0.005$ ;  $n = 3-4$ .

**Figure S8.** MS analysis of glycerophospholipid content in forebrain (A), cerebellum (B), liver (C), testis (D), kidney (E), spleen (F), lung (G), heart (H), muscle (I) and small intestine (J) of wild type, SMSrD348E, SMS2gtXSMSrD348E and SMS2gt mice. Data are means of two independent measurements  $\pm$  SEM; \*,  $p < 0.05$ , \*\*,  $p < 0.005$ ;  $n = 3-4$  ( PC, phosphatidyl choline, PE, phosphatidyl ethanolamine, PS, phosphatidyl serine, PI, phosphatidyl inositol).

**Figure S9.** Analysis of serum activities of Alanine transaminase (ALT), Aspartate transaminase (AST) and Creatine phosphokinase (CPK) in wild type ( $n = 6$ ) and SMSrD348E ( $n = 3$ ) mice. Data are means  $\pm$  SEM.

**Figure S1**

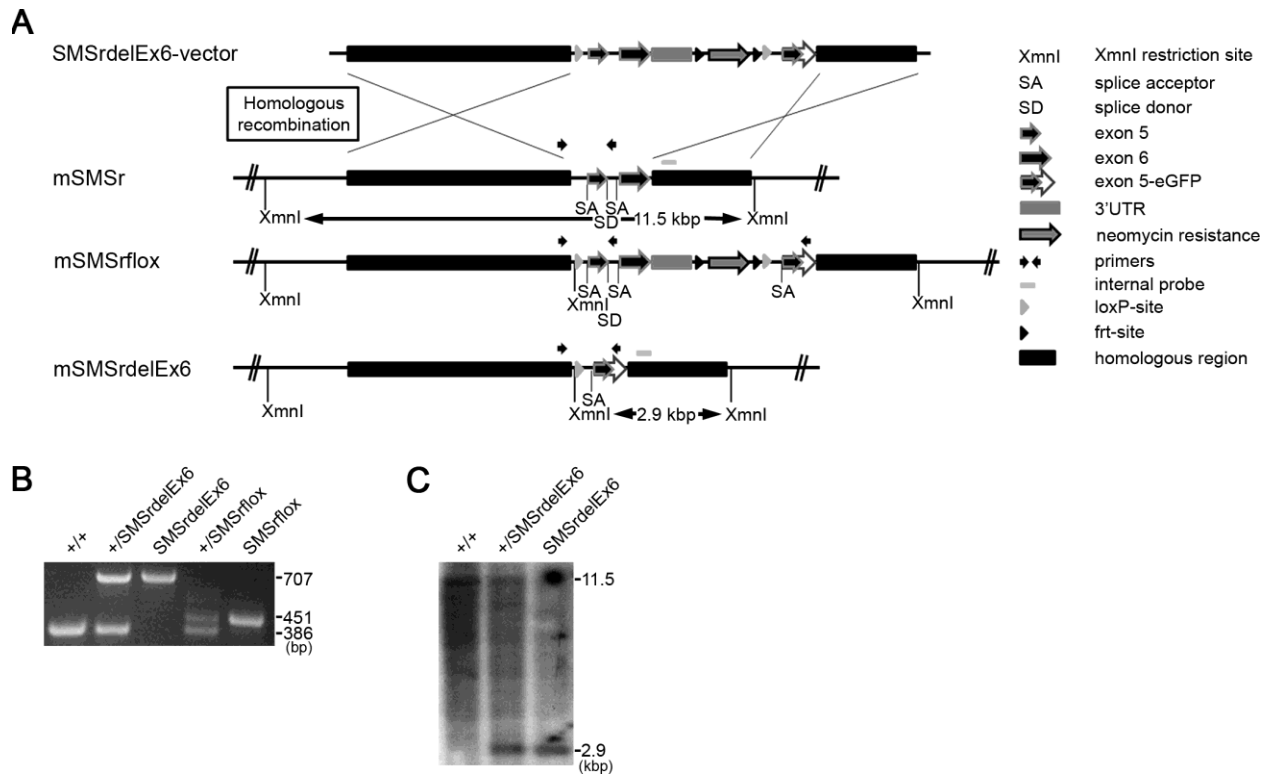

**Figure S2**

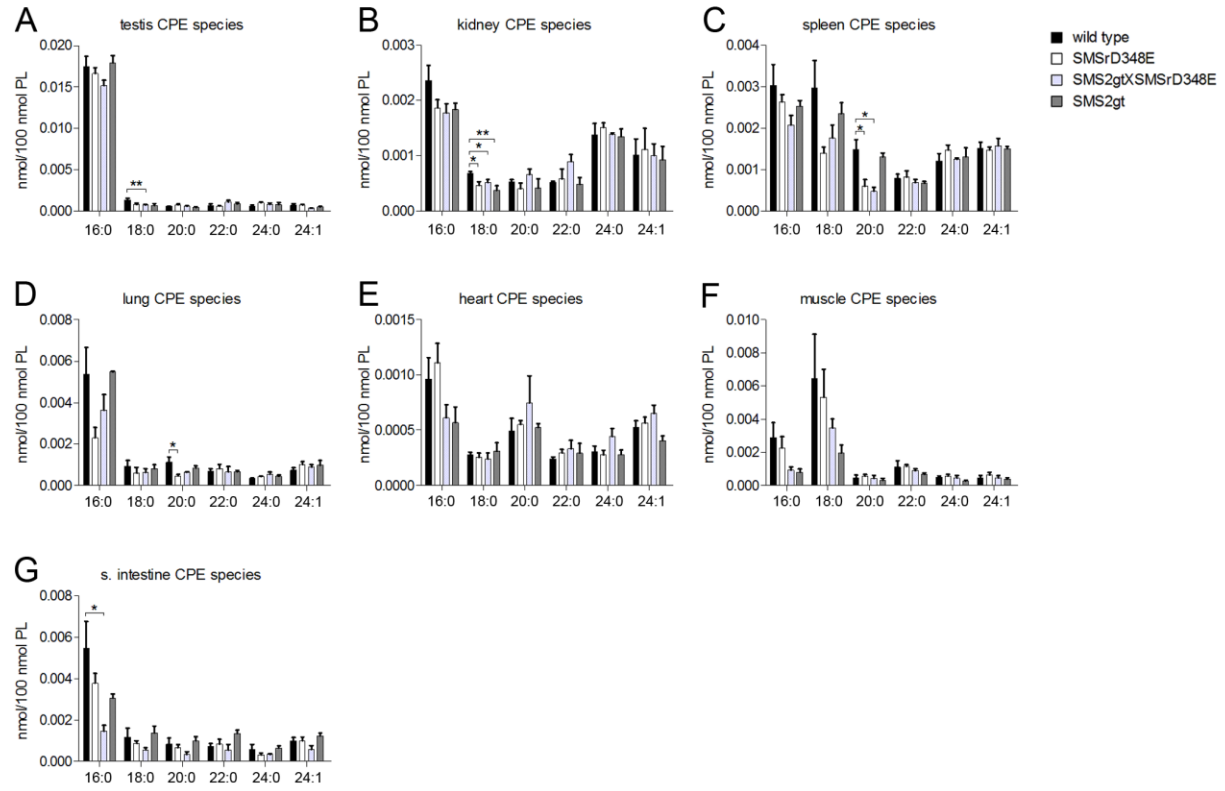

**Figure S3**

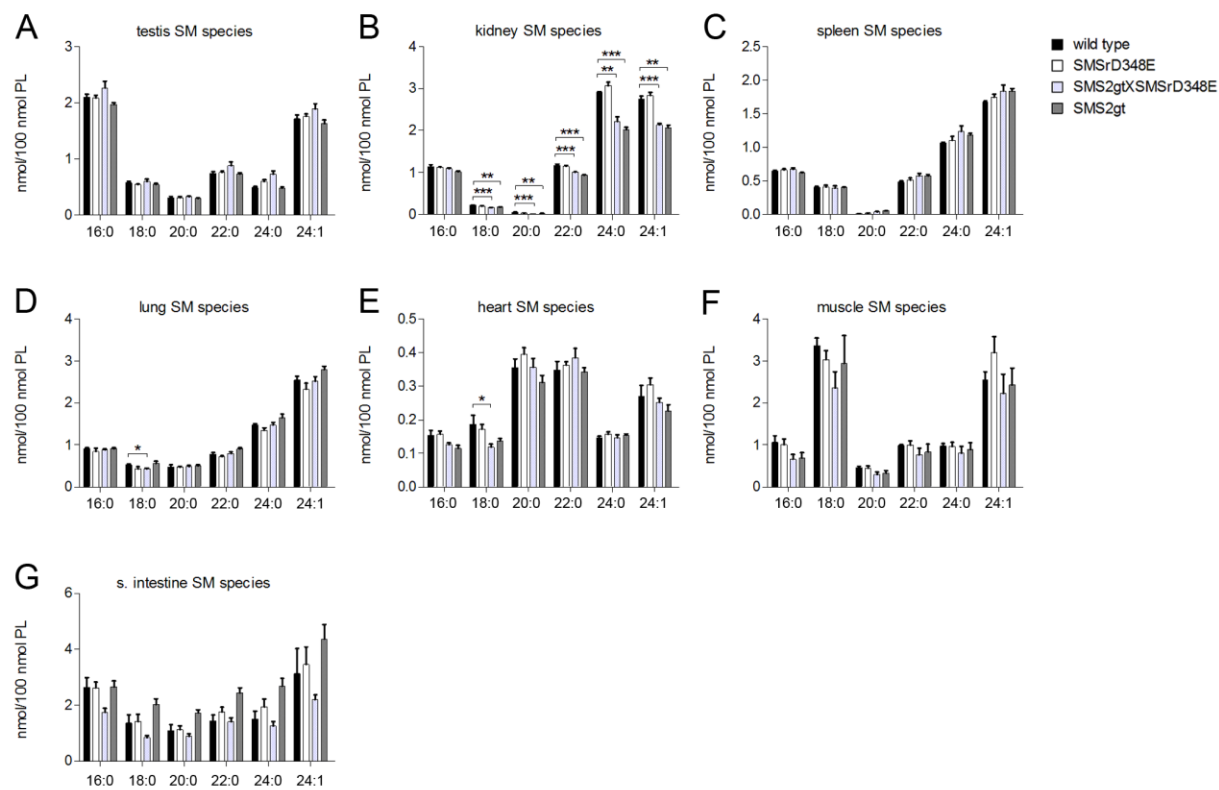

Figure S4

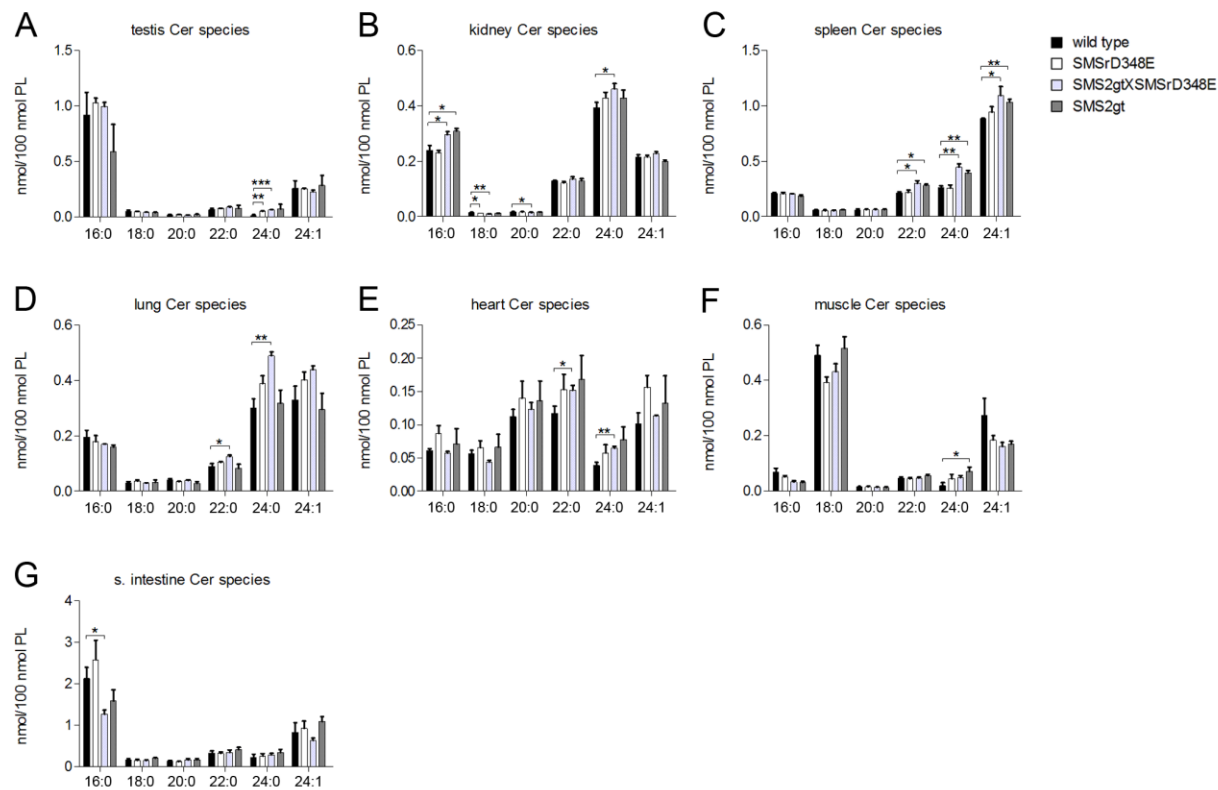

**Figure S5**

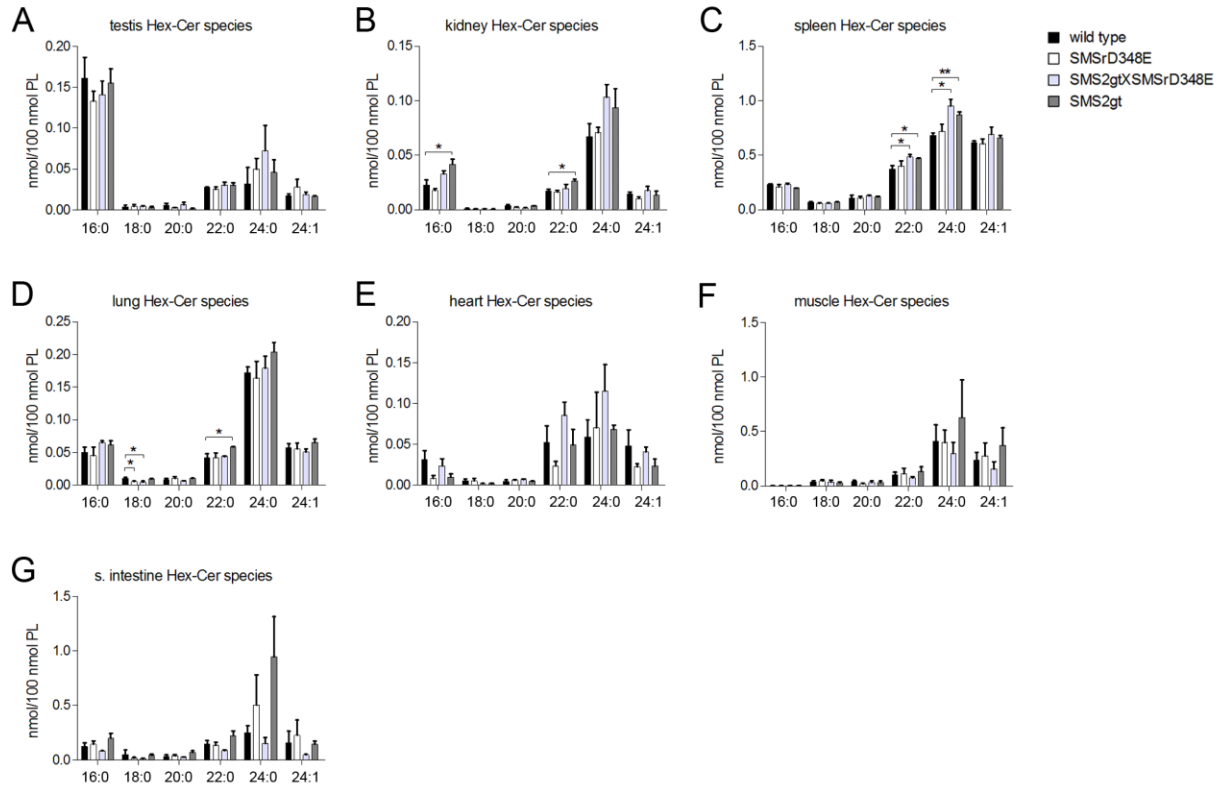

**Figure S6**

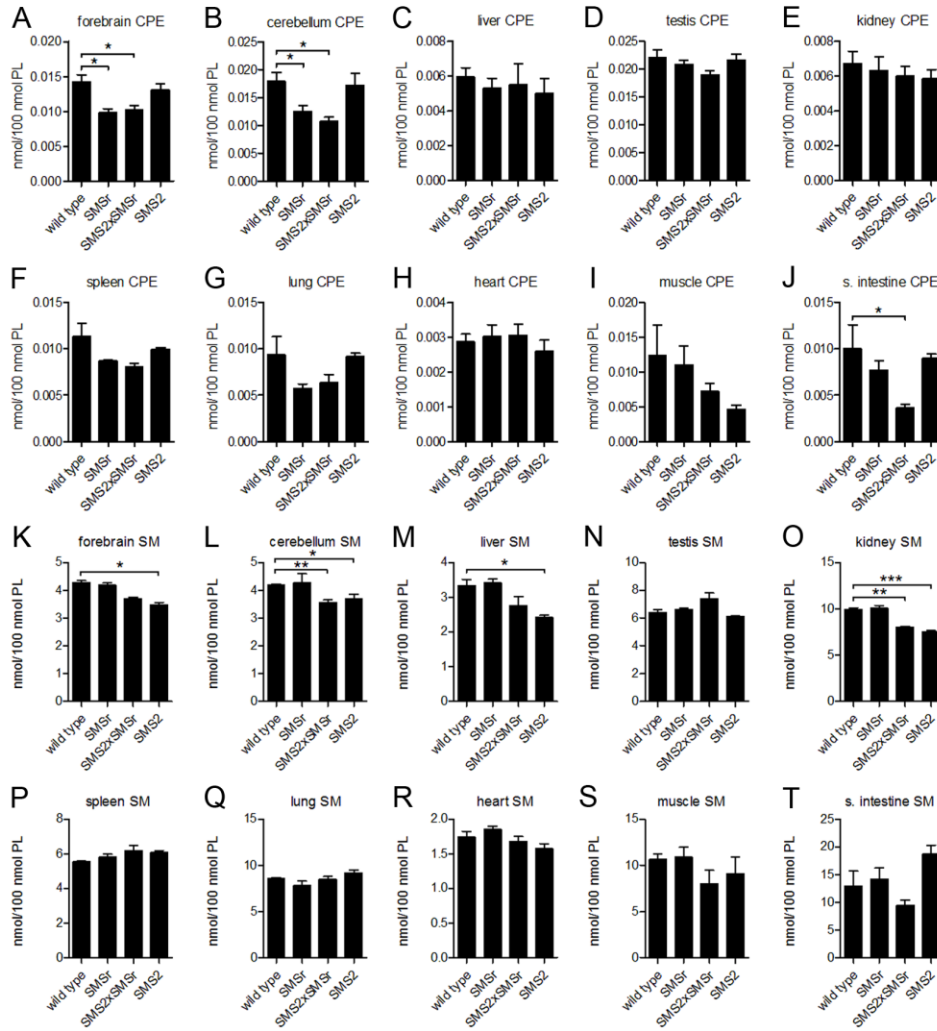



**Figure S7**

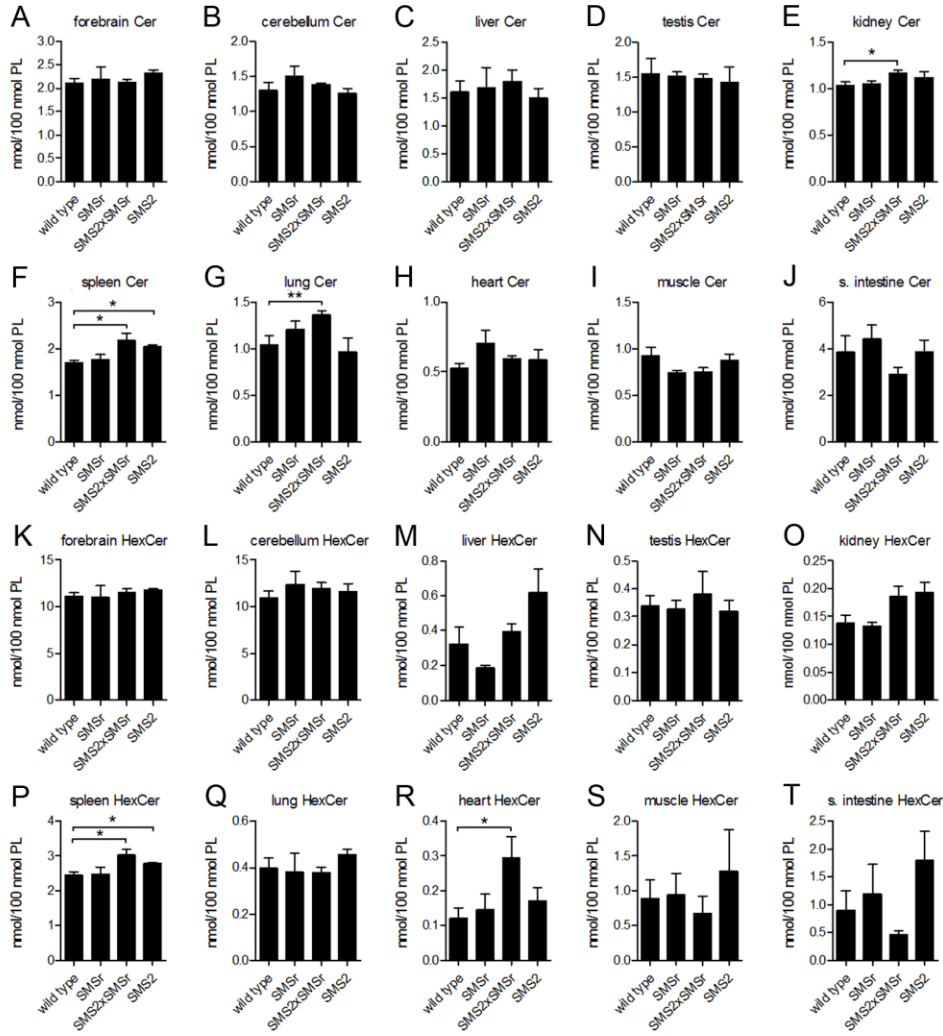

**Figure S8**

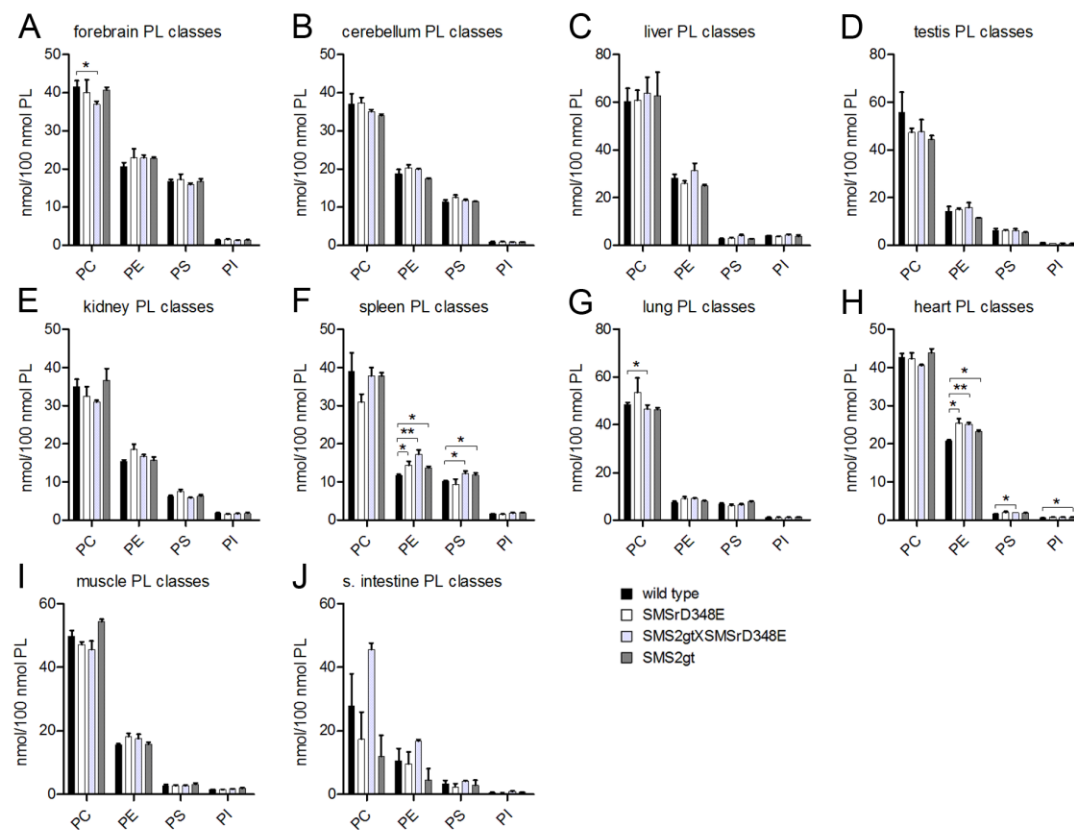

**Figure S9**

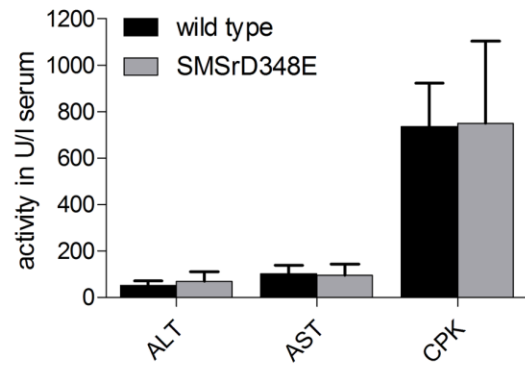

Supplement: supp_M055269_jlr.M055269-1.pdf [file supp_M055269_jlr.M055269-1.pdf]
